# Supplementary material for: Applying machine-learning to rapidly analyse large qualitative text datasets to inform the COVID-19 pandemic response: Comparing human and machine-assisted topic analysis techniques
Source: medRxiv preprint, doi:10.1101/2022.05.12.22274993, version 2 (2022-06-01)
Supplement: Supplementary material 5 [file 274993_file06.docx]

**Online supplementary material 5**

Figure 1. Ranking of topics in terms of prevalence in the corpus for question A, *“What was helpful about the information on the Germ Defence website?”***
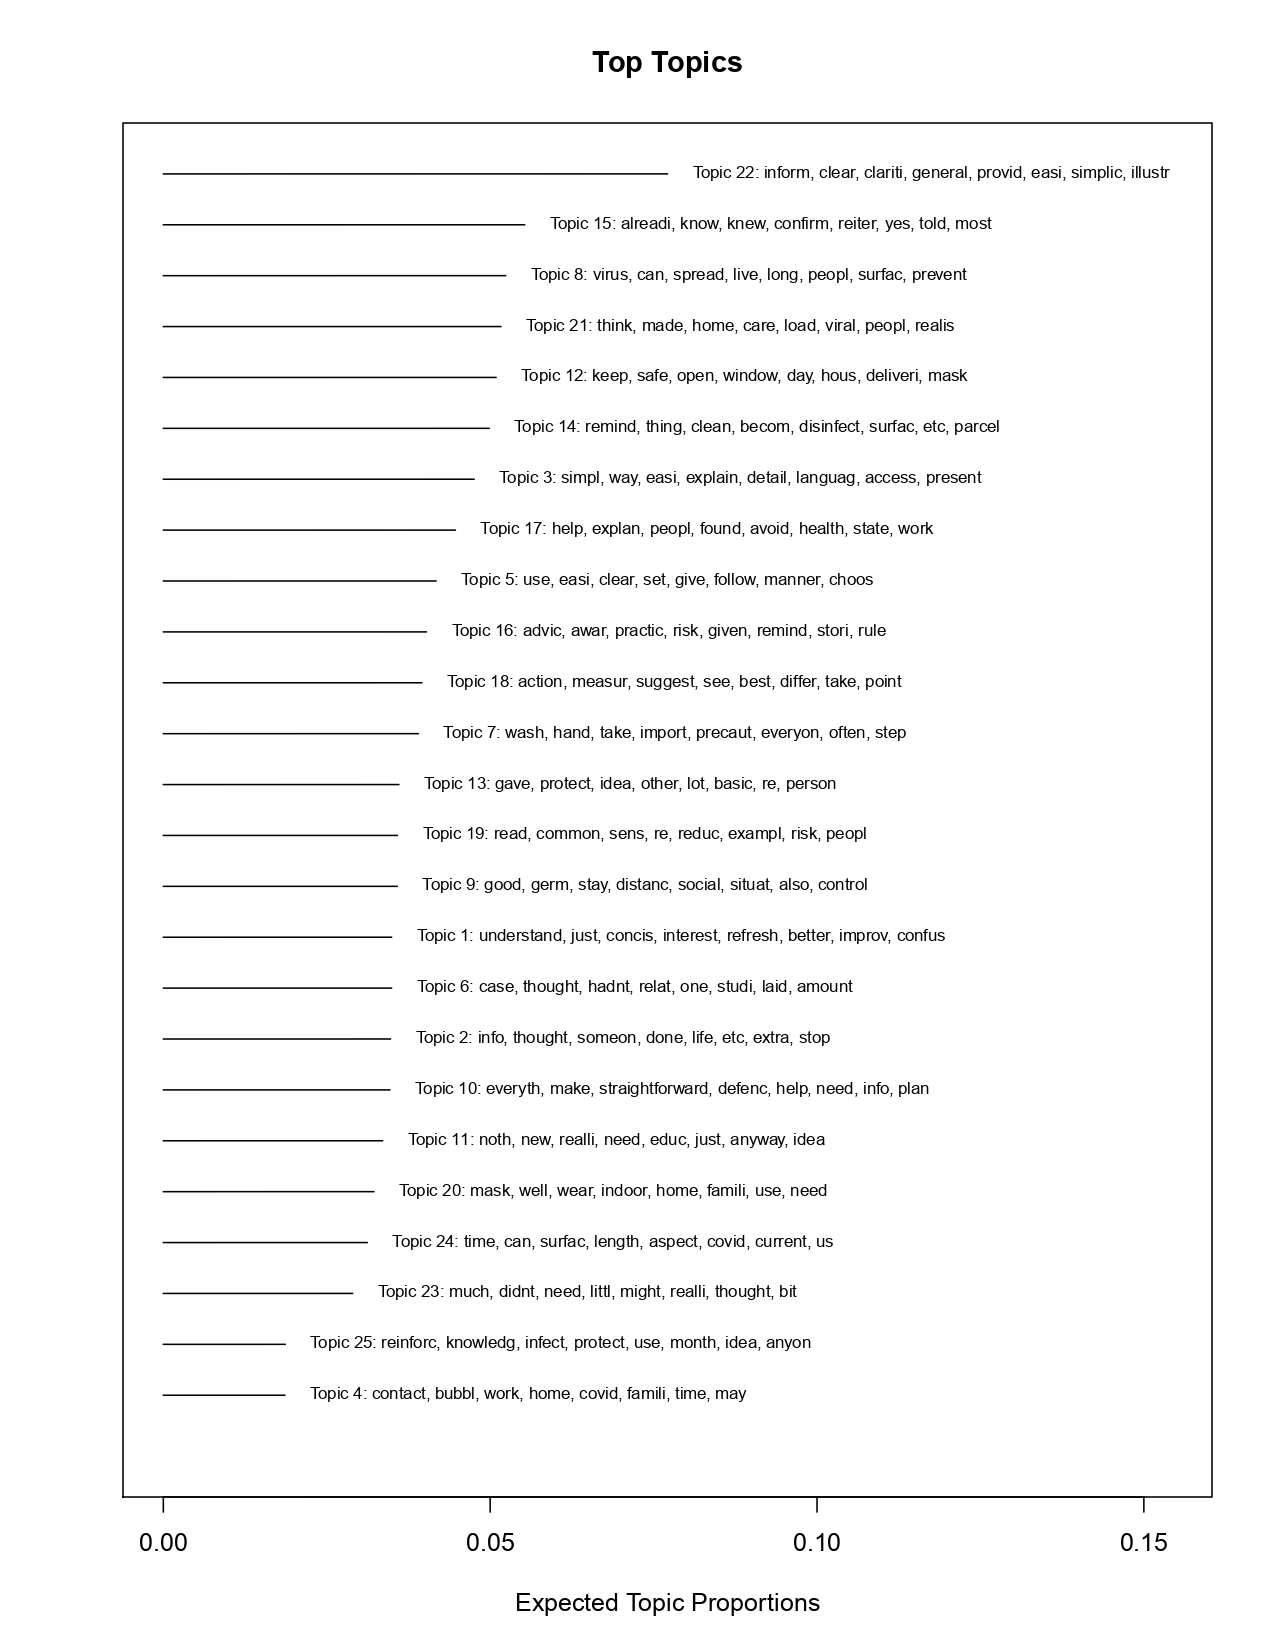
**

Figure 2. Ranking of topics in terms of prevalence in the corpus for question B*, “What did you not find helpful about the information on the Germ Defence website?”*

**
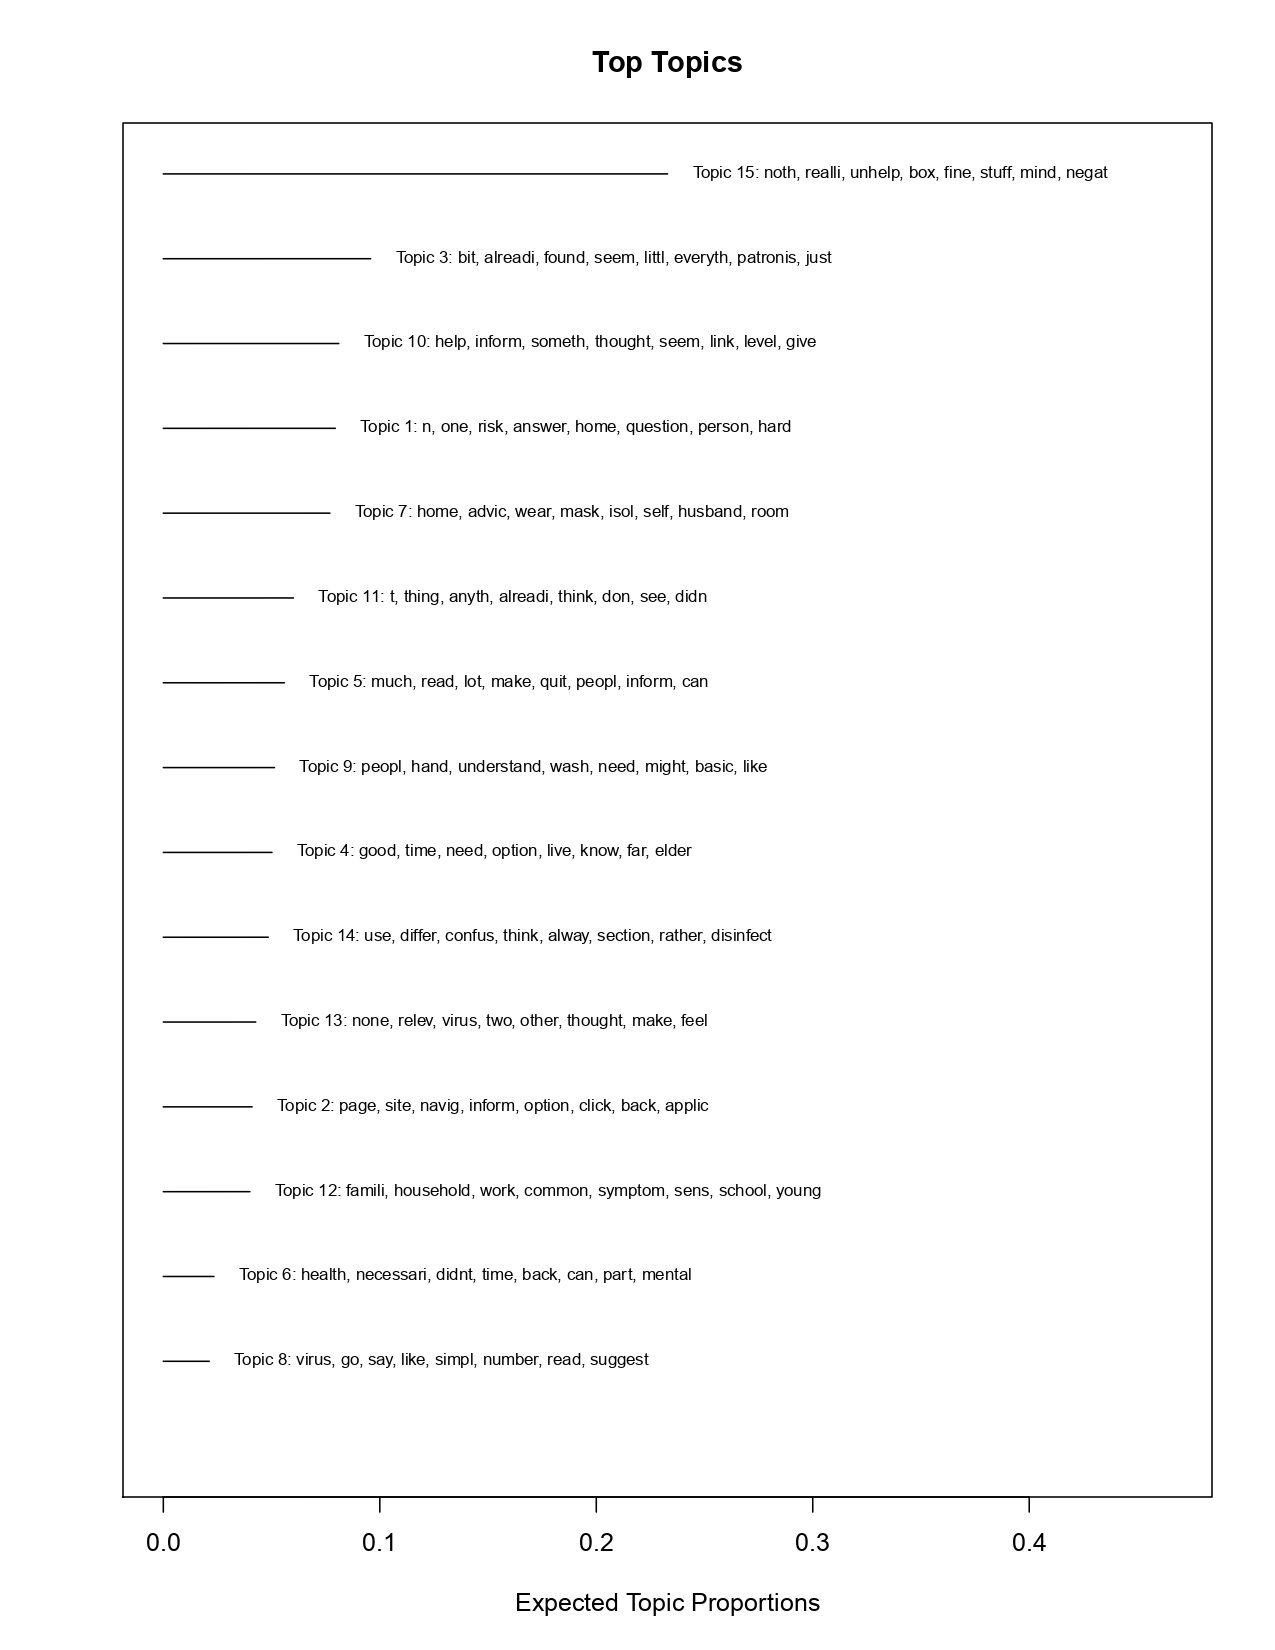
**
